# Supplementary material
Source: PubMed Central journal article supplement (PMC6461306)
Supplement: Supp_Table1.pdf [file Supp_Table1.pdf]

## Supplementary Data

SUPPLEMENTARY TABLE S1. SENSITIVITY TESTING  
OF CAMEROON HIV-1 EUROPIUM NANOPARTICLE  
IMMUNO ASSAY AT 25 PG/ML

| <i>Sample no.</i> | <i>Genotype</i> | <i>Signal/cutoff ratio</i> |
|-------------------|-----------------|----------------------------|
| 1                 | CRF02_AG        | 37.597                     |
| 2                 | CRF02_AG        | 37.640                     |
| 3                 | CRF02_AG        | 37.569                     |
| 4                 | URF             | 11.480                     |
| 5                 | CRF02_AG        | 16.976                     |
| 6                 | CRF02_AG        | 17.315                     |
| 7                 | CRF02_AG        | 4.335                      |
| 8                 | CRF06 cpx       | 5.433                      |
| 9                 | CRF02_AG        | 3.409                      |
| 10                | URF             | 6.511                      |
| 11                | CRF02_AG        | 8.269                      |
| 12                | CRF02_AG        | 9.309                      |
| 13                | URF             | 14.577                     |
| 14                | CRF02_AG        | 11.369                     |
| 15                | CRF02_AG        | 11.045                     |
| 16                | CRF02_AG        | 12.392                     |
| 17                | CRF02_AG        | 15.430                     |
| 18                | CRF02_AG        | 16.309                     |
| 19                | CRF02_AG        | 12.850                     |
| 20                | URF             | 19.865                     |
| 21                | URF             | 12.595                     |
| 22                | CRF02_AG        | 16.518                     |
| 23                | CRF02_AG        | 18.398                     |
| 24                | URF             | 12.770                     |
| 25                | CRF02_AG        | 12.761                     |
| 26                | CRF02_AG        | 16.924                     |
| 27                | CRF02_AG        | 12.755                     |
| 28                | CRF02_AG        | 18.473                     |
| 29                | CRF02_AG        | 52.450                     |
| 30                | URF             | 18.863                     |
| 31                | URF             | 11.973                     |
| 34                | Unknown         | 12.362                     |
| 36                | Unknown         | 13.426                     |
| 37                | URF             | 18.037                     |
| 38                | CRF02_AG        | 15.337                     |
| 41                | CRF02_AG        | 5.227                      |
| 42                | Unknown         | 6.211                      |
| 43                | Unknown         | 8.240                      |
| 45                | Unknown         | 16.297                     |
| 48                | Unknown         | 16.267                     |
| 49                | Unknown         | 15.267                     |
| 50                | Unknown         | 9.241                      |
| 51                | Unknown         | 15.964                     |
| 52                | CRF02_AG        | 15.219                     |
| 54                | CRF02_AG        | 15.748                     |
| 55                | Unknown         | 11.611                     |
| 56                | URF             | 18.374                     |
| 58                | CRF02_AG        | 15.288                     |
| 59                | Unknown         | 11.595                     |
| 61                | Unknown         | 15.558                     |
| 63                | F2              | 25.416                     |
| 64                | CRF02_AG        | 17.312                     |
| 65                | CRF02_AG        | 45.655                     |

SUPPLEMENTARY TABLE S1. (CONTINUED)

| <i>Sample no.</i> | <i>Genotype</i> | <i>Signal/cutoff ratio</i> |
|-------------------|-----------------|----------------------------|
| 66                | URF             | 15.323                     |
| 67                | CRF02_AG        | 1.279                      |
| 68                | Unknown         | 5.185                      |
| 69                | CRF02_AG        | 10.242                     |
| 70                | Unknown         | 12.614                     |
| 71                | Unknown         | 12.873                     |
| 72                | Unknown         | 11.452                     |
| 76                | CRF02_AG        | 15.501                     |
| 77                | Unknown         | 10.256                     |
| 78                | URF             | 14.501                     |
| 79                | Unknown         | 21.419                     |
| 80                | URF             | 16.438                     |
| 84                | CRF02_AG        | 51.219                     |
| 85                | Unknown         | 33.018                     |
| 86                | Unknown         | 26.146                     |
| 87                | Unknown         | 33.011                     |
| 88                | CRF02_AG        | 12.240                     |
| 89                | Unknown         | 14.252                     |
| 90                | URF             | 19.314                     |
| 91                | G               | 12.226                     |
| 93                | Unknown         | 5.992                      |
| 94                | Unknown         | 20.158                     |
| 95                | Unknown         | 16.120                     |
| 96                | Unknown         | 2.029                      |
| 97                | CRF02_AG        | 12.972                     |
| 98                | CRF02_AG        | 16.009                     |
| 101               | CRF02_AG        | 17.022                     |
| 102               | CRF02_AG        | 18.855                     |
| 103               | URF             | 12.362                     |
| 105               | CRF02_AG        | 11.959                     |
| 106               | CRF02_AG        | 6.258                      |

(continued)
