# Supplementary material
Source: PubMed Central journal article supplement (PMC6461306)
Supplement: Supp_Table2.pdf [file Supp_Table2.pdf]

SUPPLEMENTARY TABLE S2. QUANTITATIVE  
COMPARISON OF CAMEROON HIV SAMPLES  
WITH EUROPIUM ASSAY AND COMMERCIAL ASSAY

| Sample no. | Genotype  | Perkin Elmer assay | Europium assay with ANT152 | Europium assay with C65690m |
|------------|-----------|--------------------|----------------------------|-----------------------------|
| 1          | CRF02_AG  | 58.484             | 659.477                    | 38.985                      |
| 2          | CRF02_AG  | 126.992            | 896.421                    | 107.228                     |
| 3          | CRF02_AG  | 70.970             | 562.676                    | 98.768                      |
| 4          | URF       | 3.914              | 32.780                     | 4.496                       |
| 5          | CRF02_AG  | 62.755             | 198.083                    | 6.166                       |
| 6          | CRF02_AG  | 83.990             | 533.281                    | 104.017                     |
| 7          | CRF02_AG  | 11.226             | 11.594                     | 4.157                       |
| 8          | CRF06 cpx | 31.121             | 186.742                    | 21.398                      |
| 9          | CRF02_AG  | 28.779             | 189.826                    | 25.129                      |
| 10         | URF       | 0.005              | 28.236                     | 4.249                       |
| 11         | CRF02_AG  | 4.766              | 12.435                     | 4.094                       |
| 12         | CRF02_AG  | 1.023              | 19.595                     | 5.157                       |
| 13         | URF       | 86.208             | 588.413                    | 59.731                      |
| 14         | CRF02_AG  | 6.015              | 66.857                     | 7.720                       |
| 15         | CRF02_AG  | 88.795             | 26.151                     | 5.354                       |
| 16         | CRF02_AG  | 26.449             | 252.871                    | 43.963                      |
| 17         | CRF02_AG  | 0.904              | 503.870                    | 54.703                      |
| 18         | CRF02_AG  | 0.225              | 7.927                      | 3.777                       |
| 19         | CRF02_AG  | 84.072             | 789.239                    | 51.183                      |
| 20         | URF       | 35.421             | 379.536                    | 14.444                      |
| 21         | URF       | 59.839             | 304.390                    | 65.370                      |
| 22         | CRF02_AG  | 49.201             | 233.352                    | 25.060                      |
| 23         | CRF02_AG  | 71.011             | 26.696                     | 115.134                     |
| 24         | URF       | 70.764             | 524.470                    | 101.928                     |
| 25         | CRF02_AG  | 70.107             | 505.748                    | 86.219                      |
| 26         | CRF02_AG  | 164.040            | 931.483                    | 186.683                     |
| 27         | CRF02_AG  | 126.582            | 494.846                    | 111.968                     |
| 28         | CRF02_AG  | 83.086             | 112.530                    | 40.949                      |
| 29         | CRF02_AG  | 23.153             | 169.920                    | 7.866                       |
| 30         | URF       | 31.179             | 7.369                      | 33.200                      |
| 31         | URF       | 49.858             | 210.314                    | 55.160                      |
| 34         | Unknown   | 98.858             | 497.830                    | 145.995                     |
| 36         | Unknown   | 124.692            | 607.943                    | 187.001                     |
| 37         | URF       | 28.323             | 228.533                    | 59.044                      |
| 38         | CRF02_AG  | 0.008              | 4.548                      | 4.707                       |
| 41         | CRF02_AG  | 0.004              | 7.396                      | 4.580                       |
| 42         | Unknown   | 0.004              | 5.795                      | 4.528                       |
| 43         | Unknown   | 0.007              | 7.700                      | 4.179                       |
| 45         | Unknown   | 77.336             | 755.804                    | 72.840                      |
| 48         | Unknown   | 71.832             | 637.152                    | 118.724                     |
| 49         | Unknown   | 49.324             | 679.636                    | 33.543                      |
| 50         | Unknown   | 0.008              | 4.482                      | 4.216                       |
| 51         | Unknown   | 96.311             | 245.725                    | 141.209                     |
| 52         | CRF02_AG  | 79.636             | 37.173                     | 62.396                      |
| 54         | CRF02_AG  | 27.048             | 253.922                    | 17.915                      |
| 55         | Unknown   | 108.756            | 1880.862                   | 139.892                     |
| 56         | URF       | 14.752             | 292.475                    | 22.981                      |
| 58         | CRF02_AG  | 0.108              | 7.454                      | 4.153                       |
| 59         | Unknown   | 62.919             | 1390.529                   | 137.780                     |
| 61         | Unknown   | 169.502            | 599.702                    | 137.520                     |
| 63         | F2        | 0.272              | 13.281                     | 4.194                       |
| 64         | CRF02_AG  | 0.029              | 7.219                      | 4.002                       |
| 65         | CRF02_AG  | 0.002              | 7.315                      | 4.069                       |
| 66         | URF       | 3.016              | 50.761                     | 7.344                       |
| 67         | CRF02_AG  | 6.410              | 15.945                     | 10.746                      |
| 68         | Unknown   | 0.114              | 10.145                     | 4.513                       |
| 69         | CRF02_AG  | 0.067              | 6.896                      | 4.796                       |
| 70         | Unknown   | 12.214             | 8.277                      | 5.080                       |

SUPPLEMENTARY TABLE S2. (CONTINUED)

| Sample no. | Genotype | Perkin Elmer assay | Europium assay with ANT152 | Europium assay with C65690m |
|------------|----------|--------------------|----------------------------|-----------------------------|
| 71         | Unknown  | 229.976            | 2286.293                   | 82.030                      |
| 72         | Unknown  | 3.098              | 75.048                     | 4.961                       |
| 76         | CRF02_AG | 2.561              | 71.633                     | 7.159                       |
| 77         | Unknown  | 0.046              | 463.578                    | 42.227                      |
| 78         | URF      | 29.582             | 478.171                    | 32.436                      |
| 79         | Unknown  | 0.023              | 6.347                      | 4.820                       |
| 80         | URF      | 23.306             | 7.819                      | 4.056                       |
| 84         | CRF02_AG | 55.016             | 1373.595                   | 78.954                      |
| 85         | Unknown  | 119.631            | 2172.601                   | 170.613                     |
| 86         | Unknown  | 3.343              | 7.387                      | 5.602                       |
| 87         | Unknown  | 90.767             | 1764.790                   | 88.773                      |
| 88         | CRF02_AG | 0.072              | 938.775                    | 55.459                      |
| 89         | Unknown  | 0.039              | 5.655                      | 4.990                       |
| 90         | URF      | 0.004              | 6.063                      | 5.958                       |
| 91         | G        | 0.001              | 5.002                      | 5.229                       |
| 93         | Unknown  | 5.415              | 97.994                     | 7.754                       |
| 94         | Unknown  | 18.223             | 191.080                    | 5.024                       |
| 95         | Unknown  | 31.680             | 396.058                    | 17.031                      |
| 96         | Unknown  | 34.293             | 355.352                    | 13.225                      |
| 97         | CRF02_AG | 17.566             | 264.512                    | 24.851                      |
| 98         | CRF02_AG | 18.781             | 280.626                    | 13.810                      |
| 101        | CRF02_AG | 23.002             | 322.466                    | 25.889                      |
| 102        | CRF02_AG | 18.170             | 19.678                     | 5.176                       |
| 103        | URF      | 2.127              | 202.055                    | 25.560                      |
| 105        | CRF02_AG | 15.505             | 203.424                    | 13.703                      |
| 106        | CRF02_AG | 0.154              | 3.335                      | 4.102                       |

Values in ng/mL.

(continued)
