# Supplementary material
Source: PubMed Central journal article supplement (PMC6461306)
Supplement: Supp_Table3.pdf [file Supp_Table3.pdf]

SUPPLEMENTARY TABLE S3. QUANTITATIVE COMPARISON OF NIH INTERNATIONAL HIV PANEL WITH EUROPIUM ASSAY AND KNOWN VALUE IN NG/ML

| <i>Sample no.</i> | <i>Subtype</i> | <i>Gen Bank no.</i> | <i>Known value</i> | <i>ANT 152</i> | <i>C65690M</i> |
|-------------------|----------------|---------------------|--------------------|----------------|----------------|
| 1                 | A              | AY713407            | 150                | 159.82         | 155            |
| 2                 | A              | AY713406            | 52                 | 55.96          | 56.8           |
| 3                 | A              | AF457052            | 57                 | 54.21          | 57.4           |
| 4                 | A              | AF457057            | 13.9               | 14.19          | 15.1           |
| 5                 | A              | AF457063            | 43                 | 54.94          | 46.52          |
| 6                 | A              | AF457065            | 7                  | 8.762          | 9.02           |
| 7                 | A              | AF457066            | 16                 | 75.14          | 92.32          |
| 8                 | A              | AF457068            | 118                | 112.44         | 119.3          |
| 9                 | A              | AF457069            | 8.5                | 7.6            | 9.1            |
| 10                | A              | AF457079            | 18                 | 15.17          | 19.032         |
| 11                | B              | M17449              | 100                | 239.67         | 107.32         |
| 12                | B              | AY713409            | 92.4               | 178.33         | 103.2          |
| 13                | B              | AY173952            | 294                | 324.95         | 297.3          |
| 14                | B              | AY173955            | 294                | 146.73         | 299.4          |
| 15                | B              | AY173951            | 680                | 130.11         | 773.4          |
| 16                | B              | AY173956            | 115                | 174.61         | 154            |
| 17                | B              | AY713410            | 235                | 297.19         | 332.9          |
| 18                | B              | AY713412            | 58                 | 111.19         | 65.1           |
| 19                | B              | AY713408            | 19                 | 38.14          | 28.4           |
| 20                | B              | AY713411            | 680                | 108.52         | 697.9          |
| 21                | C              | AY713413            | 119                | 128.53         | 121.3          |
| 22                | C              | AY713414            | 17                 | 69.05          | 21.6           |
| 23                | C              | AY713416            | 157                | 173.76         | 182.4          |
| 24                | C              | AY713415            | 7.63               | 66.58          | 47.28          |
| 25                | C              | AY444801            | 11.5               | 25.07          | 16.5           |
| 26                | C              | AY255825            | 49.7               | 46.45          | 50.7           |
| 27                | C              | AY253304            | 84                 | 93.02          | 103.1          |
| 28                | C              | AY253308            | 72.9               | 90.9           | 77.4           |
| 29                | C              | AY253322            | 0.7                | 0.51           | 2.63           |
| 30                | C              | AY713417            | 61.6               | 94.8           | 99.3           |
| 31                | D              | AY713418            | 129                | 104.01         | 193.4          |
| 32                | D              | AF484502            | 13                 | 13.28          | 20.3           |
| 33                | D              | AF484518            | 290                | 202.91         | 379.3          |
| 34                | D              | AF484477            | 72.7               | 81.501         | 80.4           |
| 35                | D              | AY304496            | 42                 | 50.84          | 54.1           |
| 36                | D              | AF484516            | 46                 | 46.01          | 73.6           |
| 37                | D              | AF484486            | 115                | 133.74         | 134.3          |
| 38                | D              | AF484487            | 75.7               | 92.27          | 92.4           |
| 39                | D              | AF484515            | 16.4               | 10.61          | 25.3           |
| 40                | D              | AF457090            | 75                 | 120.66         | 92.1           |
| 41                | CRF01_AE       | AF259955            | 83                 | 101.67         | 87.45          |
| 42                | CRF01_AE       | U54771              | 124                | 153.5          | 156.3          |
| 43                | CRF01_AE       | AY713425            | 88                 | 93.92          | 90.2           |
| 44                | CRF01_AE       | AY713424            | 92                 | 107.32         | 93.3           |
| 45                | CRF01_AE       | AY713423            | 112                | 72.76          | 121.4          |
| 46                | CRF01_AE       | AY713422            | 55                 | 61.62          | 58.2           |
| 47                | CRF01_AE       | AY713426            | 103                | 21.78          | 118.2          |
| 48                | CRF01_AE       | AY713421            | 75                 | 38.58          | 75.2           |
| 49                | CRF01_AE       | AY713420            | 25.52              | 64.02          | 33.5           |
| 50                | CRF01_AE       | AY713419            | 9                  | 38.29          | 92.1           |
| 51                | CRF02_AG       | AF063223            | 65                 | 66.91          | 70.02          |
| 52                | CRF02_AG       | AY444808            | 127                | 141.6          | 165.3          |
| 53                | CRF02_AG       | AY371122            | 123                | 143.37         | 159.3          |
| 54                | CRF02_AG       | AY371123            | 98                 | 106.52         | 109.4          |
| 55                | CRF02_AG       | AY371124            | 120                | 102.94         | 133.7          |
| 56                | CRF02_AG       | AY371125            | 100                | 106.13         | 101.5          |
| 57                | CRF02_AG       | AY371126            | 289                | 47.25          | 310.4          |
| 58                | CRF02_AG       | AY371127            | 88                 | 58.17          | 106.3          |
| 59                | CRF02_AG       | AY371138            | 68                 | 62.04          | 73.4           |
| 60                | CRF02_AG       | AY371128            | 10.7               | 31.8           | 59.8           |
